# Supplementary material for: The allometry of cellular DNA and ribosomal gene content among microbes and its use for the assessment of microbiome community structure
Source: Microbiome. 2021 Aug 17;9:173. doi: 10.1186/s40168-021-01111-z (PMC8371883; doi:10.1186/s40168-021-01111-z)
Supplement: Supplementary file 2 — Additional file 1: Table S1. Taxon-specific values for primary variables (cell volume, ribosomal gene copies per cell, cellular DNA content and ploidy) as well as source variables (cell shape, cell axial dimension, ribosomal gene copies per genome and genome size) as used in the analyses presented in Fig.1 [file 40168_2021_1111_MOESM2_ESM.xlsx]

## Sheet: Sheet1
Table S1. Taxon-specific values for primary variables (cell volume, ribosomal gene copies per cell, cellular DNA content and ploidy) as well as source variables (cell shape, cell axial dimension, ribosomal gene copies per genome and genome size) as used in the analyses presented in Fig. 1
Microorganism		Main Variables					Variables used for Calculations
	Mean Cell volume	16/18S gene copies	DNA content	Mean Ploidy		Cell shape	Cell axial	16/18S RNA copies	Genome Size	Variaton range
	( Vc; µm3)	per cell (Rc)	(pg/cell)	(P)		approximation	dimensions (µm)	per genome (Rg)	(Mbp)	for 16/18S GCN's
Pelagibacter ubique	0.037	1	0.00132924	1		rod-sickle shape	N.A.	1	1.3	1
Mycoplasma gallisepticum	0.018	2	0.00103272	1		sphere	N.A.	2	1.01	2.1 ± 0.2
Prochlorococcus marinus	0.122522	1	0.00285276	1		sphere	0.6	1	2.79	1.1 ± 0.3
Bdellovibrio bacteriovorus	0.168861	2	0.00386503	1		prolate spheroid	1.5 / 0.35	2	3.78	1.6 ± 0.5
Aeropyrum pernix	0.395841	1	0.00170757	1		sphere	0.9	1	1.67	1
Pyrobaculum aerophilum	1.41372	2	0.00453988	2		rod	5 / 0.6	1	2.22	1
Sulfolobus acidocaldarius	0.395841	2	0.00453988	2		sphere	0.9	1	2.22	1
Wolinella succinogenes	2.55254	3	0.00215746	1		rod	4 /0.75	3	2.11	3
Neisseria gonorrhoeae	0.318348	12	0.00659509	3		sphere	0.8	4	2.15	4
Neisseria lactamica	0.0654498	4	0.00226994	1		sphere	0.5	4	2.22	4
Thermus thermophilus HB8	0.589049	8	0.00867076	4		rod	3 /0.5	2	2.12	2
Vibrio cholerae	0.357325	198	0.0915542	22		rod-sickle shape	3.1 / 0.38	9	4.07	9 ± 1
Neisseria meningitidis	0.940122	16	0.00928425	4		sphere	1.05	4	2.27	4 ± 0.1
Caulobacter crescentus	0.664447	4	0.00820041	2		rod-sickle shape	2.35 / 0.6	2	4.01	2
Escherichia coli	0.6	7	0.00514315	1		rod	N.A.	7	5.03	7 ± 0.3
Synechococcus sp. WH 8101	0.909229	2	0.00327198	1		sphere	1.15	2	3.2	2
Bacillus subtilis	0.9	9	0.00431493	1		rod	N.A.	9	4.22	9.5 ± 1.2
Halobacterium salinarium	1	20	0.0525562	20		prolate spheroid	N.A.	1	2.57	1
Methanocaldococcus jannaschii	1.14537	16	0.0142331	8		sphere	1.25	2	1.74	2
Borrelia hermsii	1.36136	16	0.0227403	16		prolate spheroid	12.5 / 0.35	1	1.39	1
Thermococcus kodakarensis	1.76715	13	0.0277546	13		sphere	1.5	1	2.088	1
Synechococcus elongatus pcc 7942	2.3	8	0.0114519	4		rod plus half spheres	N.A.	2	2.8	2
Deinococcus radiodurans	2.7	18	0.0201227	6		sphere	N.A.	3	3.28	3
Azotobacter vindelandii	5.3	132	0.105726	22		sphere	N.A.	6	4.7	6
Methanosarcina acetivorans	6.37063	30	0.0587935	10		sphere	2.3	3	5.75	3
Synechocystis sp. PCC 6803 (‘Kazusa’)	7	24	0.0441718	12		sphere	N.A.	2	3.6	2
Haloferax volcanii	11.3883	28	0.0574029	14		rod	2.5; 2	2	4.01	2
Desulfovibrio gigas	11.6632	52	0.0478528	13		rod-sickle shape	7.5 / 1.3	4	3.6	4
Buchnera sp.	18.8496	120	0.0809816	120		sphere	3	1	0.66	1
Nostoc sp. PCC 7120	16.6	32	0.0588957	8		prolate spheroid	N.A.	4	7.2	4
Anabaena sp. Mbd320	25.7	40.8	0.075092	10.2		prolate spheroid	N.A.	4	7.2	4
Anabaena variabilis	48	28	0.050818	7		prolate spheroid	N.A.	4	7.1	4
Azotobacter chroococcum	187	138	0.122055	23		prolate spheroid	N.A.	6	5.19	6
Anabaena cylindrica	316	100	0.18047	25		rod	N.A.	4	7.06	4
Epulopiscium fishelsoni	413643	368000	167.5	43109.2		prolate spheroid	250 / 55	8.53646	3.8	9
Thiomargarita namibiensis	396504	18000	141.902	18000		sphere	450 / 1.25	1	7.71	1
Pseudomonas putida	2.0944	140	0.12638	20		rod plus half spheres	2.0 / 1.0	7	6.18	6.7 ± 0.6
Methanococcus maripaludis	1.5	126	0.0760123	42		sphere	N.A.	3	1.77	2.6 ± 0.5
Bacillus megatherium	7.95216	156	0.0705521	12		rod	N.A.	13	5.75	12.9 ± 3.7
Streptococcus pneumoniae	0.544052	8	0.00421268	2		sphere	N.A.	4	2.06	4
Salmonella typhimurium	0.63	28	0.0202454	4		rod	N.A.	7	4.95	7
Staphylococcus aureus	0.52	6	0.00288344	1		sphere	N.A.	6	2.82	5.6 ± 0.8
Lactococcus lactis	0.598212	12	0.00513292	2		prolate spheroid	N.A.	6	2.51	5.9 ± 0.2
Corynebacterium glutamicum	0.481056	12	0.00666667	2		rod	N.A.	6	3.26	6 ± 0.2
Paenibacillus sp	0.879646	30	0.0214724	3		rod	N.A.	10	7	10.5 ± 2.1
Saccharomyces cerevisiae	86	450	0.0248611	3		prolate spheroid	N.A.	150	12.1571	152 ± 7 *
Entamoeba histolytica	2356.19	4400	0.539877	22		sphere	15	200	24	200
Trypanosoma brucei	58.8	112	2.66871	2		elongated body	N.A.	56	26.1	56
Giardia muris	519	730	0.059816	10		pear shape	N.A.	73	11.7	73
Acanthamoeba castellanii	4352.41	600	1.07362	25		sphere	17.5	24	42	24
Naegleria gruberi	808.175	16000	0.503067	4		sphere	10.5	4000	41	3000-5000
Bathycoccus prasinos	1.76715	12	0.184908	12		sphere	1.5	1	15.07	1
Chlamydomonas concordia	179.594	450	N.A.	N.A.		sphere	7	N.A.	N.A.	N.A.
Micromonas pusilla	1.04565	5	0.11227	5		prolate spheroid	1.5	1	21.96	1
Ostreococcus tauri	0.268083	4	0.0603681	4		sphere	0.8	1	14.76	1
Prasinococcus capsulatus	14.1372	2	N.A.	N.A.		sphere	3	N.A.	N.A.	N.A.
Tetraselmis sp.	119.148	34	7.92464	34		prolate spheroid	8	1	227.95	1
Epistylis sp.	52746.6	76513	N.A.	N.A.		cone+half sphere	145	N.A.	N.A.	N.A.
Favella sp.	2.41731e+06	46498	N.A.	N.A.		rod	220	N.A.	N.A.	N.A.
Pseudotontonia sp.	105721	172889	N.A.	N.A.		cone+half sphere	120	N.A.	N.A.	N.A.
Tintinnopsis sp.	1.27165e+06	126372	N.A.	N.A.		rod	195	N.A.	N.A.	N.A.
Strombidinopsis sp.	523599	30247	N.A.	N.A.		sphere	100	N.A.	N.A.	N.A.
Strombidium sp.	25639.4	34647	932.245	8661.75		cone+half sphere	45	4	105.26	4
Vorticella sp.	117993	160000	N.A.	N.A.		cone+half sphere	100	N.A.	N.A.	N.A.
Vorticella sp.1	136591	161355	N.A.	N.A.		cone+half sphere	105	N.A.	N.A.	N.A.
Vorticella sp.2	136591	315786	N.A.	N.A.		cone+half sphere	105	N.A.	N.A.	N.A.
Vorticella sp.3	117993	99376	N.A.	N.A.		cone+half sphere	100	N.A.	N.A.	N.A.
Vorticella sp.4	117993	61226	N.A.	N.A.		cone+half sphere	100	N.A.	N.A.	N.A.
Vorticella sp.5	117993	82194	N.A.	N.A.		cone+half sphere	100	N.A.	N.A.	N.A.
Zoothamnium sp.1	6928.8	40675	N.A.	N.A.		prolate spheroid	35	N.A.	N.A.	N.A.
Zoothamnium sp.2	6928.8	3385	N.A.	N.A.		prolate spheroid	35	N.A.	N.A.	N.A.
Sphaerozoum sp	1.15035e+06	70556	N.A.	N.A.		sphere	130	N.A.	N.A.	N.A.
Sphaerozoum fuscum	676750	26189.4	N.A.	N.A.		sphere	108.4	N.A.	N.A.	N.A.
Collozoum pelagicum	282267	45534.3	N.A.	N.A.		sphere	81	N.A.	N.A.	N.A.
Coscinodiscus wailesii	4.18879e+06	33689	N.A.	N.A.		disk	200	N.A.	N.A.	N.A.
Cylindrotheca closterium	2362.19	484	N.A.	N.A.		rod	67	N.A.	N.A.	N.A.
Ditylum brightwellii	16963.2	36896	N.A.	N.A.		rod	69	N.A.	N.A.	N.A.
Extubocellulus spinifer	8.04248	150	N.A.	N.A.		rod	4	N.A.	N.A.	N.A.
Nitzschia closterium	32.0571	199	N.A.	N.A.		rod	20	N.A.	N.A.	N.A.
Phaeodactylum tricornicum	169.646	88	N.A.	N.A.		rod	24	N.A.	N.A.	N.A.
Skeletonema marinoi	223.654	61	N.A.	N.A.		disk	9	N.A.	N.A.	N.A.
Thalassioria sp.	1352.41	636	N.A.	N.A.		disk	15	N.A.	N.A.	N.A.
Thalassioria weisflogii	217.562	49	N.A.	N.A.		rod	10	N.A.	N.A.	N.A.
Mesopedinella arctica	268.083	33	N.A.	N.A.		sphere	8	N.A.	N.A.	N.A.
Akashiwo sanguineum	29088.8	30545	N.A.	N.A.		prolate spheroid	50	N.A.	N.A.	N.A.
Alexandrium andersonii	6370.63	1603	N.A.	N.A.		sphere	23	N.A.	N.A.	N.A.
Amphidinium carterae	1045.65	840	N.A.	N.A.		prolate spheroid	15	N.A.	N.A.	N.A.
Gymnodinium chlorophorum	2572.44	1673	N.A.	N.A.		sphere	17	N.A.	N.A.	N.A.
Heterocapsa triquetra	1108.45	4872	N.A.	N.A.		prolate spheroid	19	N.A.	N.A.	N.A.
Lingulodinium polyedrum	28730.9	12812	N.A.	N.A.		sphere	38	N.A.	N.A.	N.A.
Peridinium faeroense	11494	1057	N.A.	N.A.		sphere	28	N.A.	N.A.	N.A.
Prorocentrum micans	13535.3	4996	N.A.	N.A.		cone+half sphere	49	N.A.	N.A.	N.A.
Prorocentrum minimum	4188.79	1432	21.4873	716		sphere	20	2	29.35	2
Prorocentrum nux	523.599	143	N.A.	N.A.		sphere	10	N.A.	N.A.	N.A.
Prorocentrum lima	17241.1	10086	N.A.	N.A.		prolate spheroid	42	N.A.	N.A.	N.A.
Protoceratium reticulatum	22449.3	6644	N.A.	N.A.		sphere	35	N.A.	N.A.	N.A.
Scrippsiella trochoidea	11494	4112	N.A.	N.A.		sphere	28	N.A.	N.A.	N.A.
Allogromia laticollaris	2.80616e+06	35000	N.A.	N.A.		sphere	175	N.A.	N.A.	N.A.
Bolivina variabilis	2.80616e+06	7500	N.A.	N.A.		cone+half sphere	175	N.A.	N.A.	N.A.
Rosalina sp.	2.80616e+06	10000	N.A.	N.A.		sphere	175	N.A.	N.A.	N.A.
Emiliania huxleyi	14.1372	4	0.342904	2		sphere	3	2	167.68	2
Rhodomonas salina	83.7758	204	N.A.	N.A.		prolate spheroid	10	N.A.	N.A.	N.A.
Nannochloropsis salina	4.18879	1	0.0283845	1		sphere	2	1	27.76	1
Oxytricha nova	261412	100000	N.A.	N.A.		prolate spheroid	150	N.A.	N.A.	N.A.
Tetrahymena thermophila	11362.8	9000	N.A.	N.A.		prolate spheroid	50	N.A.	N.A.	N.A.
Stylonychia lemnae	1.10601e+06	200000	11188.1	200000		prolate spheroid	230	1	54.71	1
MAST-4	8.18123	30	N.A.	N.A.		sphere	2.5	N.A.	N.A.	N.A.
NOTES
*	The value of Rg reported for S. cerevisiae corresponds to a WT strain. However, variability in the range of 100-200 gene copies has been observed, and variants of the strain have average values of 139 ± 25.
Codes	calculated from other variables		directly reported in source			bacteria	eukaryotes	archaea
Sources for reported values of Rc:	SI Refs. 1-12
Sources for reported values of Vc	SI Refs. 13-28
Sources for reported values of P	SI Refs. 29--52
Sources for reported values of Rg	SI Refs. 53-56
References
1	Zhu F, Massana R, Not F, Marie D, & Vaulot D (2005) Mapping of picoeucaryotes in marine ecosystems with quantitative PCR of the 18S rRNA gene. FEMS microbiology ecology 52(1):79-92.
2	Gong J, Dong J, Liu X, & Massana R (2013) Extremely high copy numbers and polymorphisms of the rDNA operon estimated from single cell analysis of oligotrich and peritrich ciliates. Protist 164(3):369-379.
3	Biard T, et al. (2017) Biogeography and diversity of Collodaria (Radiolaria) in the global ocean. The ISME journal 11(6):1331-1344.
4	Godhe A, et al. (2008) Quantification of diatom and dinoflagellate biomasses in coastal marine seawater samples by real-time PCR. Applied and environmental microbiology 74(23):7174-7182.
5	Weber AA & Pawlowski J (2013) Can abundance of protists be inferred from sequence data: a case study of Foraminifera. PloS one 8(2):e56739.
6	Heyse G, Jönsson F, Chang W-J, & Lipps HJ (2010) RNA-dependent control of gene amplification. Proceedings of the National Academy of Sciences 107(51):22134-22139.
7	Rodríguez‐Martínez R, et al. (2009) Distribution of the uncultured protist MAST‐4 in the Indian Ocean, Drake Passage and Mediterranean Sea assessed by real‐time quantitative PCR. Environmental microbiology 11(2):397-408.
8	Prescott DM (1994) The DNA of ciliated protozoa. Microbiological reviews 58(2):233-267.
9	Kapler GM (1993) Developmentally regulated processing and replication of the Tetrahymena rDNA minichromosome. Current opinion in genetics & development 3(5):730-735.
10	Mendell JE, Clements KD, Choat JH, & Angert ER (2008) Extreme polyploidy in a large bacterium. Proceedings of the National Academy of Sciences 105(18):6730-6734.
11	Talaue CO, del Rosario RC, Pfeiffer F, Mendoza ER, & Oesterhelt D (2016) Model construction and analysis of respiration in Halobacterium salinarum. PloS one 11(3):e0151839.
12	Sarcina M & Mullineaux CW (2000) Effects of tubulin assembly inhibitors on cell division in prokaryotes in vivo. FEMS microbiology letters 191(1):25-29.
13	Schulz‐Vogt HN, Angert ER, & Garcia‐Pichel F (2007) Giant Bacteria. eLS.
14	Floc’h K, et al. (2019) Cell morphology and nucleoid dynamics in dividing Deinococcus radiodurans. Nature communications 10(1):1-13.
15	Zhao X, et al. (2017) Three-dimensional structure of the ultraoligotrophic marine bacterium “Candidatus pelagibacter ubique”. Applied and environmental microbiology 83(3).
16	Shuter BJ, Thomas J, Taylor WD, & Zimmerman AM (1983) Phenotypic correlates of genomic DNA content in unicellular eukaryotes and other cells. The American Naturalist 122(1):26-44.
17	Makarieva AM, et al. (2008) Mean mass-specific metabolic rates are strikingly similar across life's major domains: evidence for life's metabolic optimum. Proceedings of the National Academy of Sciences 105(44):16994-16999.
18	Jeong J, Snay J, & Ataai M (1990) A mathematical model for examining growth and sporulation processes of Bacillus subtilis. Biotechnology and bioengineering 35(2):160-184.
19	Labarre J, Chauvat F, & Thuriaux P (1989) Insertional mutagenesis by random cloning of antibiotic resistance genes into the genome of the cyanobacterium Synechocystis strain PCC 6803. Journal of bacteriology 171(6):3449-3457.
20	Hu B, Yang G, Zhao W, Zhang Y, & Zhao J (2007) MreB is important for cell shape but not for chromosome segregation of the filamentous cyanobacterium Anabaena sp. PCC 7120. Molecular microbiology 63(6):1640-1652.
21	Garrity GM (2012) Bergey's manual of systematic bacteriology: Volume one: the Archaea and the deeply branching and phototrophic bacteria (Springer Science & Business Media).
22	Allman R, Hann A, Phillips A, Martin K, & Lloyd D (1990) Growth of Azotobacter vinelandii with correlation of Coulter cell size, flow cytometric parameters, and ultrastructure. Cytometry: The Journal of the International Society for Analytical Cytology 11(7):822-831.
23	Lineweaver H (1938) Physical characteristics of cells of azotobacter, rhizobium, and saccharomyces. Journal of bacteriology 35(5):501.
24	Zakhartsev M & Reuss M (2018) Cell size and morphological properties of yeast Saccharomyces cerevisiae in relation to growth temperature. FEMS yeast research 18(6):foy052.
25	Grünfelder CG, et al. (2002) Accumulation of a GPI‐anchored protein at the cell surface requires sorting at multiple intracellular levels. Traffic 3(8):547-559.
26	Adam RD (2001) Biology of Giardia lamblia. Clinical microbiology reviews 14(3):447-475.
27	Carini PJ (2013) Genome-enabled investigation of the minimal growth requirements andphosphate metabolism for Pelagibacter marine bacteria.
28	Staley M, Hill GE, Josefson CC, Armbruster JW, & Bonneaud C (2018) Bacterial pathogen emergence requires more than direct contact with a novel passerine host. Infection and Immunity 86(3).
29	Griese M, Lange C, & Soppa J (2011) Ploidy in cyanobacteria. FEMS microbiology letters 323(2):124-131.
30	Rendulic S, et al. (2004) A predator unmasked: life cycle of Bdellovibrio bacteriovorus from a genomic perspective. Science 303(5658):689-692.
31	Hildenbrand C, Stock T, Lange C, Rother M, & Soppa J (2011) Genome copy numbers and gene conversion in methanogenic archaea. Journal of bacteriology 193(3):734-743.
32	Pecoraro V, Zerulla K, Lange C, & Soppa J (2011) Quantification of ploidy in proteobacteria revealed the existence of monoploid,(mero-) oligoploid and polyploid species. PloS one 6(1):e16392.
33	Spaans SK, van der Oost J, & Kengen SW (2015) The chromosome copy number of the hyperthermophilic archaeon Thermococcus kodakarensis KOD1. Extremophiles 19(4):741-750.
34	Maldonado R, Jiménez J, & Casadesús J (1994) Changes of ploidy during the Azotobacter vinelandii growth cycle. Journal of bacteriology 176(13):3911-3919.
35	Postgate JR, Kent HM, ROBSON RL, & CHESSHYRE JA (1984) The genomes of Desulfovibrio gigas and D. vulgaris. Microbiology 130(7):1597-1601.
36	Starr MP, Stolp H, Trüper HG, Balows A, & Schlegel HG (2013) The prokaryotes: a handbook on habitats, isolation and identification of bacteria (Springer Science & Business Media).
37	Soppa J (2014) Polyploidy in archaea and bacteria: about desiccation resistance, giant cell size, long-term survival, enforcement by a eukaryotic host and additional aspects. Journal of molecular microbiology and biotechnology 24(5-6):409-419.
38	Lane N (2015) The vital question: energy, evolution, and the origins of complex life (WW Norton & Company).
39	Tobiason DM & Seifert HS (2006) The obligate human pathogen, Neisseria gonorrhoeae, is polyploid. PLoS Biol 4(6):e185.
40	Tobiason DM & Seifert HS (2010) Genomic content of Neisseria species. Journal of bacteriology 192(8):2160-2168.
41	Ohtani N, Tomita M, & Itaya M (2010) An extreme thermophile, Thermus thermophilus, is a polyploid bacterium. Journal of bacteriology 192(20):5499-5505.
42	Paranjape SS & Shashidhar R (2017) The ploidy of Vibrio cholerae is variable and is influenced by growth phase and nutrient levels. FEMS Microbiology Letters 364(19).
43	Bernander R, Palm JD, & Svärd SG (2001) Genome ploidy in different stages of the Giardia lamblia life cycle. Cellular microbiology 3(1):55-62.
44	Ohbayashi R, et al. (2019) Coordination of Polyploid Chromosome Replication with Cell Size and Growth in a Cyanobacterium. mBio 10(2):e00510-00519.
45	Breuert S, Allers T, Spohn G, & Soppa J (2006) Regulated polyploidy in halophilic archaea. PloS one 1(1):e92.
46	Lohia A (2003) The cell cycle of Entamoeba histolytica. Molecular and cellular biochemistry 253(1-2):217-222.
47	Borst P, Van der Ploeg M, Van Hoek JF, Tas J, & James J (1982) On the DNA content and ploidy of trypanosomes. Molecular and biochemical parasitology 6(1):13-23.
48	Byers TJ (1986) Molecular biology of DNA in Acanthamoeba, Amoeba, Entamoeba, and Naegleria. Int Rev Cytol 99:311-341.
49	Fritz-Laylin LK, et al. (2010) The genome of Naegleria gruberi illuminates early eukaryotic versatility. Cell 140(5):631-642.
50	Von Dassow P, et al. (2009) Transcriptome analysis of functional differentiation between haploid and diploid cells of Emiliania huxleyi, a globally significant photosynthetic calcifying cell. Genome biology 10(10):R114.
51	Weeks DP (2011) Homologous recombination in Nannochloropsis: a powerful tool in an industrially relevant alga. Proceedings of the National Academy of Sciences 108(52):20859-20860.
52	Kitten T & Barbour AG (1992) The relapsing fever agent Borrelia hermsii has multiple copies of its chromosome and linear plasmids. Genetics 132(2):311-324.
53	Stoddard SF, Smith BJ, Hein R, Roller BRK, & Schmidt TM (2014) rrnDB: improved tools for interpreting rRNA gene abundance in bacteria and archaea and a new foundation for future development. Nucleic Acids Research 43(D1):D593-D598.
54	Zeng Y & Jiao N (2009) A NOVEL METHOD FOR ASSESSMENT OF 16S RRNA GENE COPY NUMBER IN BACTERIAL GENOMES BY PULSED‐FIELD GEL ELECTROPHORESIS AND PCR AMPLIFICATION. Journal of Rapid Methods & Automation in Microbiology 17(3):274-279.
55	Allen HK, et al. (2016) Pipeline for amplifying and analyzing amplicons of the V1–V3 region of the 16S rRNA gene. BMC research notes 9(1):380.
56	Schirrmeister BE, Dalquen DA, Anisimova M, & Bagheri HC (2012) Gene copy number variation and its significance in cyanobacterial phylogeny. BMC microbiology 12(1):177.
