# Supplementary material for: The allometry of cellular DNA and ribosomal gene content among microbes and its use for the assessment of microbiome community structure
Source: Microbiome. 2021 Aug 17;9:173. doi: 10.1186/s40168-021-01111-z (PMC8371883; doi:10.1186/s40168-021-01111-z)
Supplement: Supplementary file 4 — Additional file 3:Table S3. Explicit dataset used in Fig. ure 2. Original 16S rRNA gene amplicon sequencing data, taxonomic assignments, and qPCR 16S rRNA gene quantifications are from Roush et al. (2020). Estimations of taxon-specific cell number and taxon-specific biovolume according to Materials and Methods. [file 40168_2021_1111_MOESM4_ESM.xlsx]

## Sheet: Sheet1
	Phylogenetic assignment					Estimated	Estimated
			Typical cell volume	Estimated Rc	16S rRNA genes	cell number	biovlume
Phylum	Family or Order	Genus-level or finer	(µm^3) *		(cm^-2 )	(cm^-2 )	(µm^3 cm^-2)
Alphaproteobacteria	Erythrobacteraceae	Erythrobacter sp.	0.578577	5.03399	16700	2862.57	1656.22
		Rhodocista sp.	0.29531	3.21507	41809.8	11144.6	3291.1
	Rhodospirillaceae	Rhodovibrio sp.	1.6081	9.95132	5658.46	498.715	801.985
		Rhodospirillumsp.	2.474	13.2619	838.291	55.7675	137.969
		Rubrimonas sp.	1.49226	9.46746	131926	12209.2	18219.3
	Rhodobacterales	Rhodovulum sp.	0.48302	4.46322	4296.24	830.493	401.145
		Rhodobacter marinus	2.54469	13.5133	209.573	13.6877	34.8311
		Roseinatronobacter sp.	0.424115	4.09255	628.718	132.308	56.1138
		Rhodobaca sp.	0.808175	6.29035	1676.58	231.58	187.157
		Roseibacterium sp.	1.06186	7.54598	3981.88	460.197	488.664
		Rhodomicrobium sp	0.502655	4.58337	161476	30412.7	15287.1
	Rhizobiales	Rhodoligotrophus sp.	0.523599	4.70981	3353.16	614.929	321.976
		Rhodobium sp.	1.53938	9.66574	419.145	38.0106	58.5127
		Afifella sp.	1.53938	9.66574	14670.1	1330.37	2047.95
		Blastochloris sp.	2.51327	13.4018	1886.15	124.193	312.131
		Roseospirillum sp.	1.36188	8.90767	3143.59	308.823	420.58
		Rhodoplanes sp.	0.466003	4.35776	209.573	41.4719	19.326
Gammaproteobacteria	Chromatiales	Halochromatium sp.	14.9226	43.9441	314.359	6.46819	96.522
		Thiorhodovibirio sp.	1.63199	10.0496	209.573	18.2939	29.8555
		Thiorhodococcus sp.	56.8105	107.141	104.786	0.900616	51.1644
Chlorobi	Chlorobiaceae	Prosthecochloris sp.	0.28667	3.15205	3981.88	1082.17	310.225
Chloroflexi	Chloroflexales	Roseiflexus sp.	4.31969	19.2297	1.4383e+06	66492.8	287228
		Chlorothrix sp.	37.1101	80.6614	120190	1364.16	50624.2
		Chloroploca sp	0.871792	6.61627	209.573	27.55	24.0179
		Chloroflexus sp	5.49779	22.5838	1886.15	74.4923	409.543
Cyanobacteria	Pleurocapsales	Hyella sp/ Cand. Pleurinema sp.	5.19902	21.758	1.08352e+06	3542.51	18417.6
		Xenococccus sp /Pleurocapsa sp.	1588.47	987.015	20500	1057.98	1.68056e+06
		UBC (Stanieria)	230.122	272.255	256324	572.549	131756
	Oscillatoriales	Leptolyngbya terebrans	2101.46	1189.47	86483	208.477	438108
		Halomicronema hangchloris	26.5747	64.563	224576	3170.02	84242.5
		Leptolyngbya murrayi	95.6144	151.596	43169.6	264.103	25252
	Stigonematales	Mastigocoleus testarum	452.651	427.412	166071	45.35	20527.7
				Totals:	3.67265e+06	139192	2.76085e+06
* see Suppl. Methods for cell volume assignments
